# Supplementary material
Source: Springer Nature journal article supplement (https://www.springermedizin.de/resource/supplementary/12888_2008_571_MOESM1_ESM.pdf/9483636)

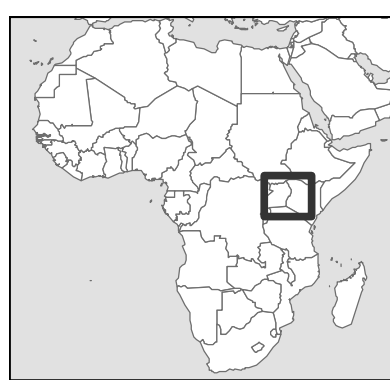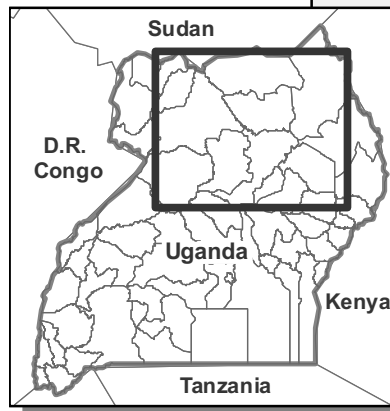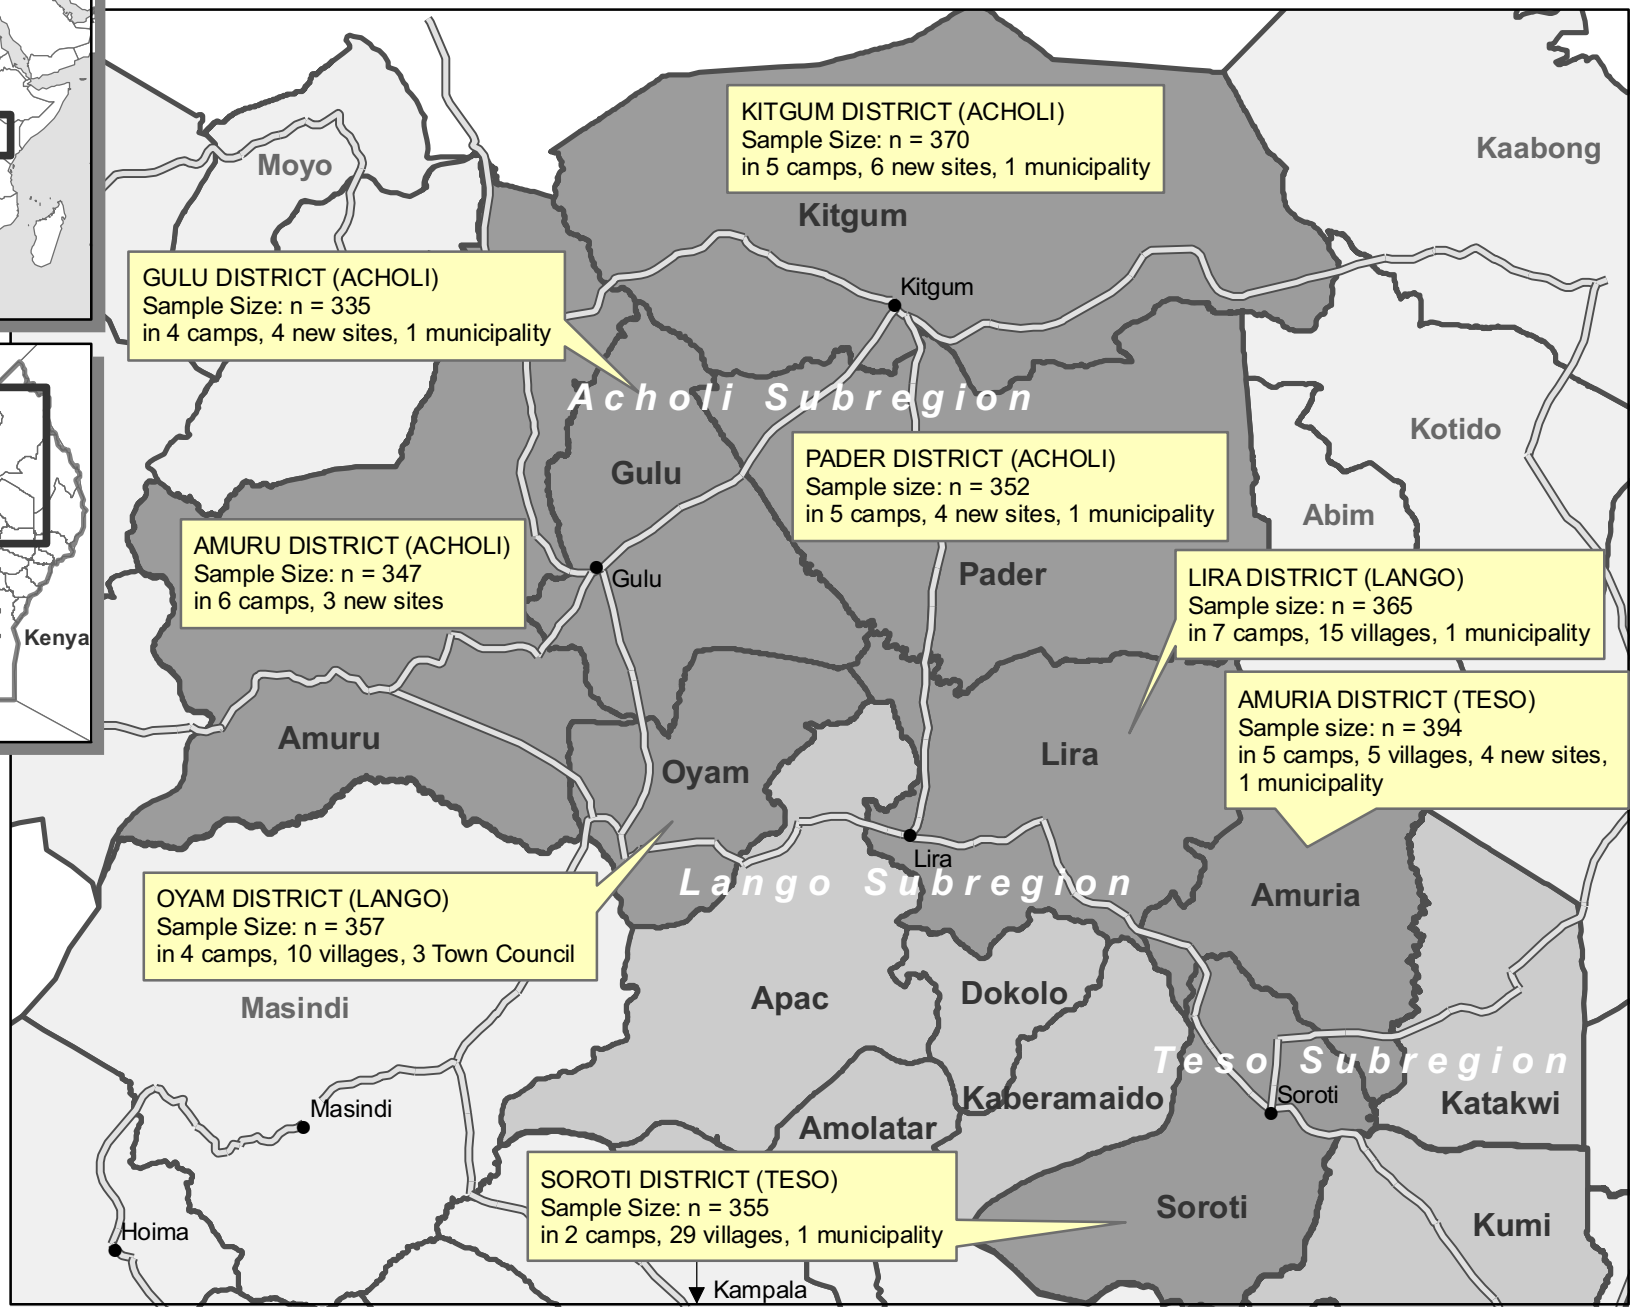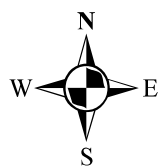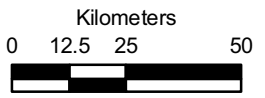

Map by Vinck P

Data Source:  
Administrative limits  
provided by CartONG

Supplement: MOESM1 [file 9483636]
